# Supplementary material for: Seroprevalence of the Serological Markers of Transfusion-Transmissible Infections among Volunteer Blood Donors of Kosti Obstetrics and Gynecology Hospital
Source: MDPI journal article supplement (doi:10.3390/medicines8110064), 2021-10-29
Supplement: s1 [file s1]

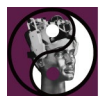

# Supplementary Materials: Seroprevalence of the Serological Markers of Transfusion-Transmissible Infections among Volunteer Blood Donors of Kosti Obstetrics and Gynecology Hospital

Babiker Saad Almugadam, Omer Mohammed Ali Ibrahim and Yousif Mousa Alobaid Ahmed

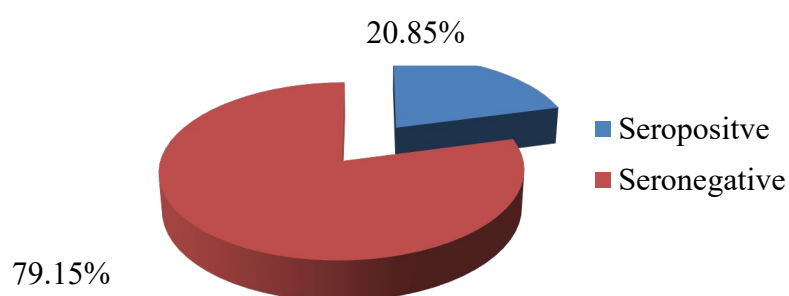

**Figure S1.** Rate of the serologic marker of single infection.
